# Supplementary material
Source: PubMed Central journal article supplement (PMC4348788)
Supplement: supp_pp.114.256016_256016revsupptbls.pdf [file supp_pp.114.256016_256016revsupptbls.pdf]

**Supplemental Table S1.** Polymerase chain reaction (PCR) primers used for construction of vectors, gene structure analysis, and chromatin immunoprecipitation (ChIP) analysis

| Gene (GenBank accession number or locus number) | Primer name   | Forward primer (5'-3')                                  | Reverse primer (5'-3')                                    | Product size (nt) | Use                                                                                                               |
|-------------------------------------------------|---------------|---------------------------------------------------------|-----------------------------------------------------------|-------------------|-------------------------------------------------------------------------------------------------------------------|
| <i>WRKY42</i><br>(AK110587)                     | 153U3F/153U3R | <u>AAGGTACCTTCAATTTT</u><br>GCTTTGCTTG <sup>a</sup>     | <u>AAGGTACCGAGTGAGG</u><br>GAGGTAGCAGAT <sup>a</sup>      | 1187              | Amplifying genomic DNA for constructing <i>WRKY42</i> -overexpressing vector                                      |
|                                                 | 153R4F/153R4R | <u>ACTAGTGGTACCAACGG</u><br>AAGGCGTCGTGGAG <sup>b</sup> | <u>GAGCTCGGATCCTGGTC</u><br>AGTCGTCCTGTGCTCC <sup>c</sup> | 313               | Amplifying cDNA fragment for constructing <i>WRKY42</i> RNAi vector                                               |
|                                                 | 1536F/1536R   | <u>TCTAGAGCCATGGCGGA</u><br>TCCGTTCC <sup>d</sup>       | <u>TCTAGACAATCTTCCAGT</u><br>AGTTTGGTCC <sup>d</sup>      | 759               | Amplifying the complete coding sequence for subcellular localization analysis and transcriptional activity vector |
|                                                 | N1F/N1R       | AGGAACCGTAAACATCA<br>GCC                                | GAGAAGCAAGCAAAGC<br>AAAAT                                 | 336               | Analyzing the ChIP product and constructing reporter vector                                                       |
|                                                 | N2F/N2R       | TTATGTTTTGAATCGCTG<br>GTA                               | CGGGCTGATGTTTACGG<br>T                                    | 215               | Analyzing the ChIP product and constructing reporter vector                                                       |
|                                                 | N3F/N3R       | ATTCTGTAGTCAATCTG<br>AGT                                | ATATCTGTCTTCTCAA<br>TCT                                   | 357               | Analyzing the ChIP product and constructing reporter vector                                                       |
|                                                 | 1532F/R       | <u>ATGAATTCGATCCGTTCC</u><br>CGGCGGC <sup>e</sup>       | <u>ATAGGATCCAGCAATCTT</u><br>CCAGTAGTTTGGTCA <sup>c</sup> | 750               | Amplifying cDNA fragment for constructing <i>WRKY42</i> pGAL4-BD vector and effector                              |

|                               |                             |                                                 |                                                  |      |  | vector                                                                                   |
|-------------------------------|-----------------------------|-------------------------------------------------|--------------------------------------------------|------|--|------------------------------------------------------------------------------------------|
|                               | 153Y1F/153Y1R               | ATGGCGGATCCGTTCCC<br>G                          | TCCGCCGGGATGTCGGC<br>G                           | 507  |  | Amplifying cDNA fragment for constructing <i>WRKY42</i> pGAL4-BD vector                  |
|                               | 153Y2F/153Y2R               | CCGGCGGACGACTATTC<br>G                          | GAGCAATCTTCCAGTAG<br>TTT                         | 261  |  | Amplifying cDNA fragment for constructing <i>WRKY42</i> pGAL4-BD vector                  |
|                               | 153GAL4F/153GAL4R           | AAGGTACCGCCATGGCG<br>GATCCGTT <sup>c</sup>      | AAGGTACCCTAGAGCAA<br>TCTTCCAGTAG <sup>c</sup>    | 759  |  | Amplifying the complete coding region for constructing transcriptional activation vector |
|                               | 153JGF/153JGR               | GAATTCATGGCGGATCC<br>GTTCCCGG <sup>e</sup>      | CTCGAGCTAGAGCAATC<br>TTCCAGTAG <sup>f</sup>      | 759  |  | Amplifying the complete coding region to construct yeast one hybrid vector               |
| <i>WRKY13</i><br>(EF143611)   | WRKY1322<br>F/WRKY13<br>22R | ACTAGTGGTACCAGAAG<br>CGGGTGGTGTCCG <sup>b</sup> | GAGCTCGGATCCATTCG<br>TTCTCCGCTGGCTC <sup>c</sup> | 366  |  | Amplifying cDNA fragment for constructing <i>WRKY13</i> RNAi construct                   |
|                               | WRKY1323<br>F/WRKY13<br>23R | GCGTATCCTCCGCCGTT<br>TGA                        | CACCACCACCACTCCCG<br>GCG                         | 1001 |  | Amplifying the promoter sequence for constructing reporter vector                        |
|                               | WRKY1320<br>F/WRKY13<br>20R | TCTAGAGGAGTGGTGGT<br>GGTGATG <sup>d</sup>       | TCTAGAGGAGCACGGCG<br>CGGTGGC <sup>d</sup>        | 964  |  | Amplifying the complete coding region for constructing transcriptional activity vector   |
|                               | WRKY1316<br>F/WRKY13<br>13R | ATGAATTCGGAGTGGTG<br>GTGGTGATG <sup>e</sup>     | ATAGGATCCAGGAGCAC<br>GGCGCGGTGGC <sup>c</sup>    | 963  |  | Amplifying the complete coding region for constructing effector vector                   |
| <i>WRKY45-2</i><br>(GQ331927) | WRKY45F<br>5/WRKY45         | ATGAATTCCTTGCTTGGA<br>TTGAGGATG <sup>c</sup>    | ATGGATCCTCACCGAAG<br>AATCATGGATG <sup>c</sup>    | 978  |  | Amplifying the complete coding region for constructing                                   |

|                                  | R5                          |                                                          |                                                     |      | effector vector                                                                                      |
|----------------------------------|-----------------------------|----------------------------------------------------------|-----------------------------------------------------|------|------------------------------------------------------------------------------------------------------|
|                                  | WRKY45T<br>F/WRKY45<br>TR   | <u>AAGGTACCATGACGTCA</u><br>TCGATGTCGCCG <sup>a</sup>    | <u>AAGGTACCAAAGCTCAA</u><br>ACCCATAATG <sup>a</sup> | 978  | Amplifying the complete coding region for constructing transcriptional activation vector             |
|                                  | WRKY45F<br>4/WRKY45<br>R3   | GACATCAAGGAGGCAA<br>AGGC                                 | GGGTGGAGGCAGGTCG<br>GTAT                            | 959  | Amplifying the promoter sequence for constructing reporter vector                                    |
|                                  | WRKY45J<br>GF/WRKY<br>45JGR | <u>GAATTCATGACGTCATC</u><br><u>GATGTCGC</u> <sup>c</sup> | <u>CTCGAGTCAAAAGCTCA</u><br>AACCCATAA <sup>f</sup>  | 959  | Amplifying the complete coding region to construct yeast one hybrid vector                           |
| <i>bZIP23</i><br>(AK072062)      | bZIP23F/bZ<br>IP23R         | <u>AAGGTACCATGGATTTT</u><br>CCGGGAGGG <sup>a</sup>       | <u>AAGGTACCCCATGGACC</u><br>CGTCAGAGT <sup>a</sup>  | 1071 | Amplifying the complete coding region for constructing transcriptional activation vector             |
| <i>Pot</i><br>(Z33638)           | PotF/PotR                   | ACGACCCGTCTTTACTT<br>ATTTGG                              | AAGTAGCGTTGGTTTTG<br>TTGGAT                         | 98   | Quantitatively amplifying the <i>M. oryzae</i> genomic DNA for fungal growth analysis                |
| <i>Ubiquitin</i><br>(Os03g13170) | UbiqF/Ubiq<br>R             | AACCAGCTGAGGCCCAA<br>GA                                  | ACGATTGATTTAACCAG<br>TCCATGA                        | 76   | Quantitatively amplifying the rice genomic DNA to standardize DNA samples for fungal growth analysis |

<sup>a</sup>The underlined nucleotides are the digestion site of *KpnI*.

<sup>b</sup>The underlined nucleotides are the digestion site of *SpeI* and the double underlined nucleotides are the digestion site of *KpnI*.

<sup>c</sup>The underlined nucleotides are the digestion site of *SacI* and the double underlined nucleotides are the digestion site of *BamHI*.

<sup>d</sup>The underlined nucleotides are the digestion site of *XbaI*.

<sup>e</sup>The underlined nucleotides are the digestion site of *EcoRI*.

<sup>f</sup>The underlined nucleotides are the digestion site of *XhoI*.

**Supplemental Table S2.** Primers used for quantitative polymerase chain reaction (qPCR) in gene expression analysis

| Gene (GenBank accession number) | Primer name | Forward primer (5'-3')   | Reverse primer (5'-3') | Product size (nt) |
|---------------------------------|-------------|--------------------------|------------------------|-------------------|
| <i>WRKY13</i><br>(EF143611)     | WRKY13-F/R  | TCAGTGGAGAAGCGGGTGGTG    | GGGTGGTTGTGCTCGAAGGAG  | 253               |
| <i>WRKY42</i><br>(AK110587)     | WRKY42-F/R  | ATGCAGTCTGCTTCAGATTATGCT | GACGCCTTCCGTTTTTTCTTG  | 100               |
| <i>AOS2</i><br>(AY062258)       | AOS2-F/R    | CAATACGTGTACTGGTCGAATGG  | AAGGTGTCGTACCGGAGGAA   | 120               |
| <i>JAZ8</i><br>(AK108738)       | JAZ8-F/R    | GAAGGCTCAACAGCTGACCAT    | TTGGTGGACGGGAAGTTCTC   | 120               |
| <i>Actin</i><br>(X15865)        | Actin-F/R   | TGTATGCCAGTGGTCGTACCA    | CCAGCAAGGTCGAGACGAA    | 121               |
